# Supplementary material for: STARRPeaker: uniform processing and accurate identification of STARR-seq active regions
Source: PubMed Central journal article supplement (PMC7722316; doi:10.1186/s13059-020-02194-x), 2020-12-08

Figure S1

A

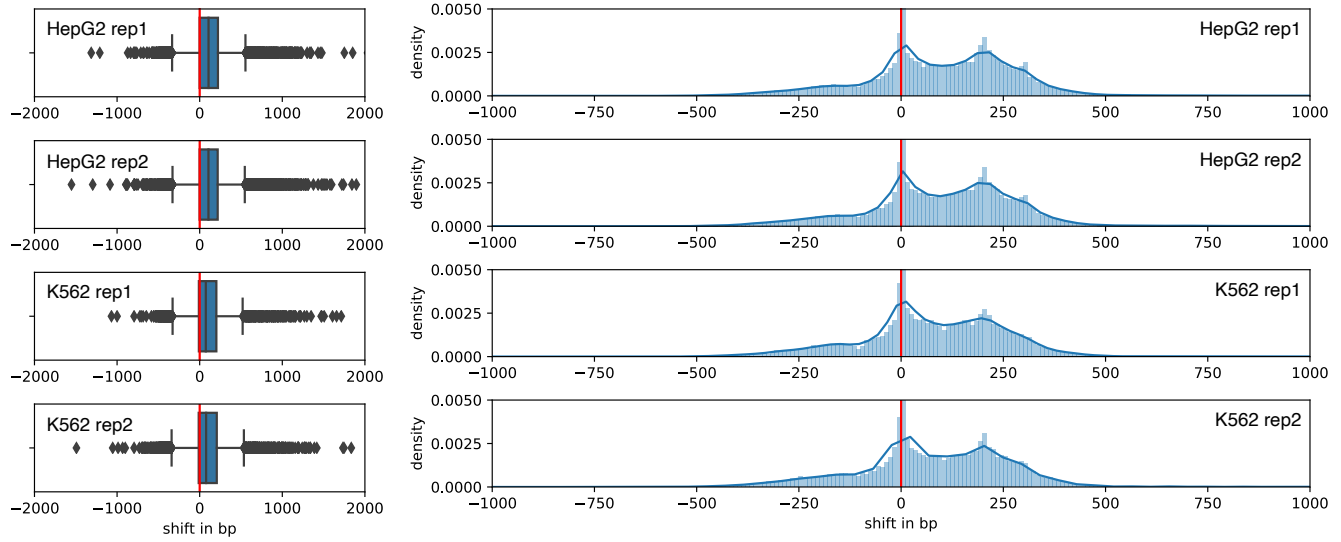

B

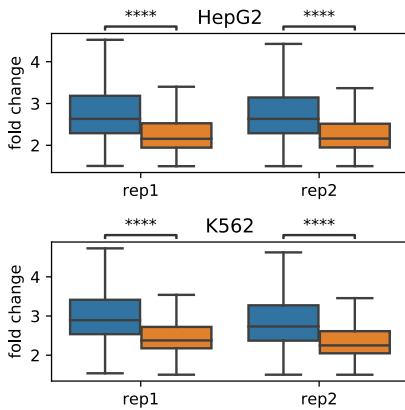

C

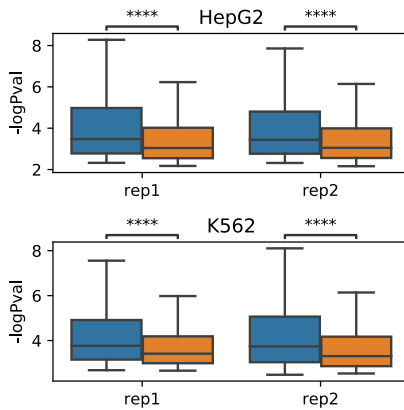

D

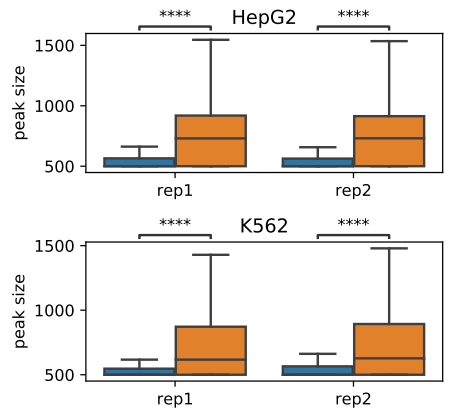

Fragment Center  
Read Start

**Figure S2**

**A K562 ORI-WG-STARR-seq**

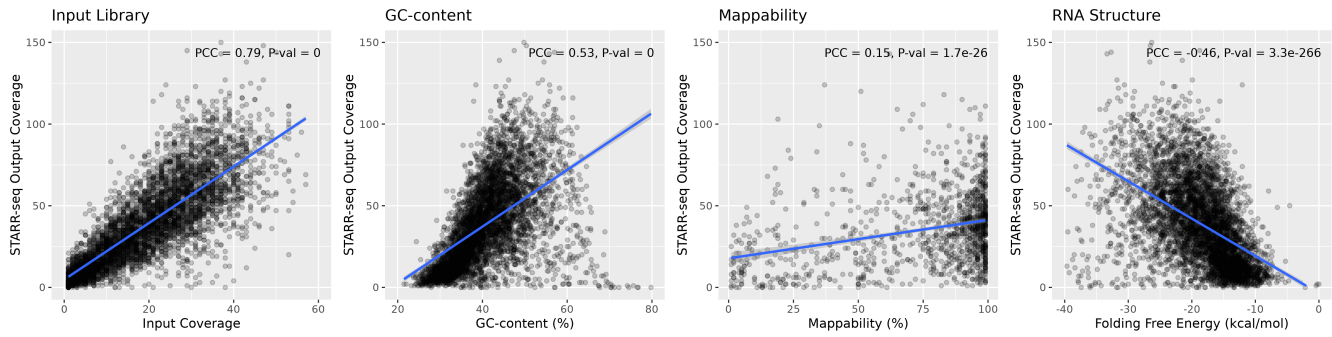

**B HeLa-S3 untreated WG-STARR-seq (Muerdter 2018)**

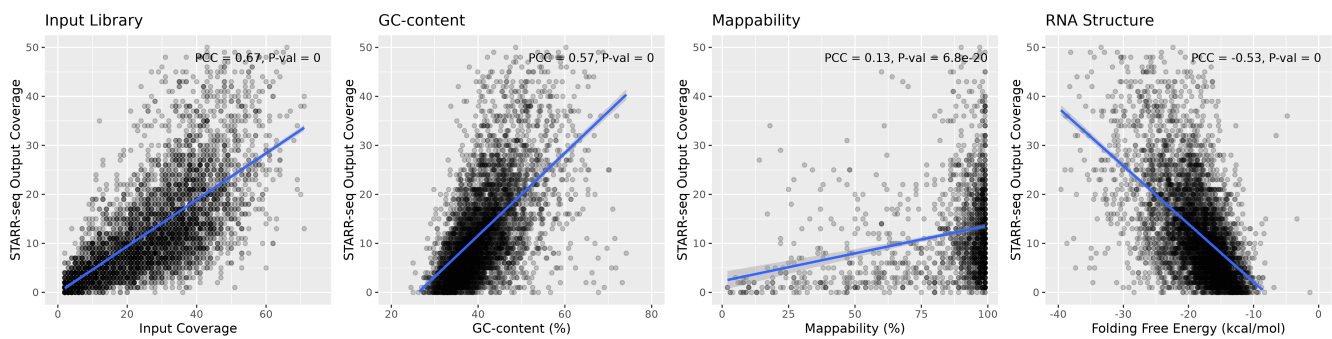

**C GM12878 HiDRA ATAC-STARR-seq (Wang 2018)**

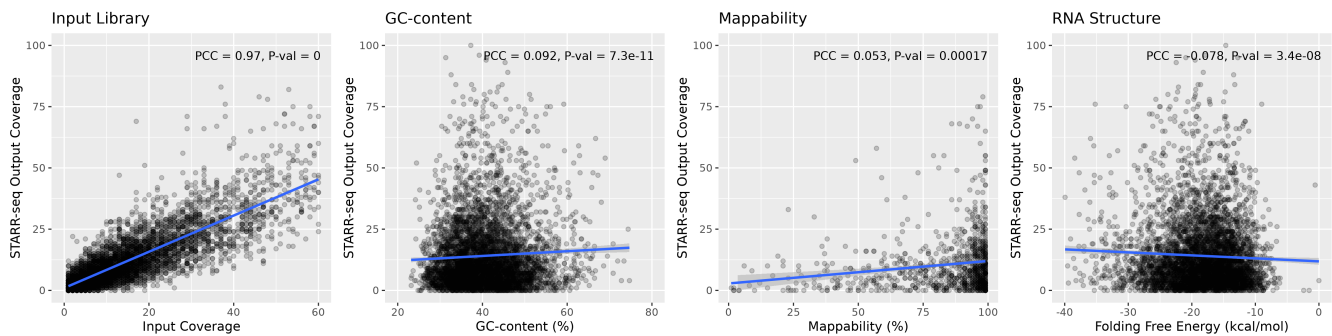

**D K562 Cap-STARR-seq (Rathert 2015)**

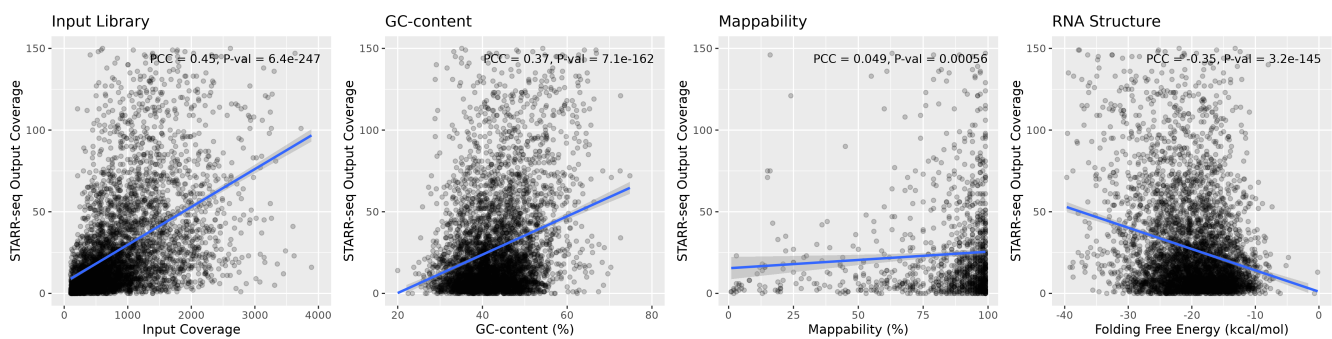

Figure S3

A

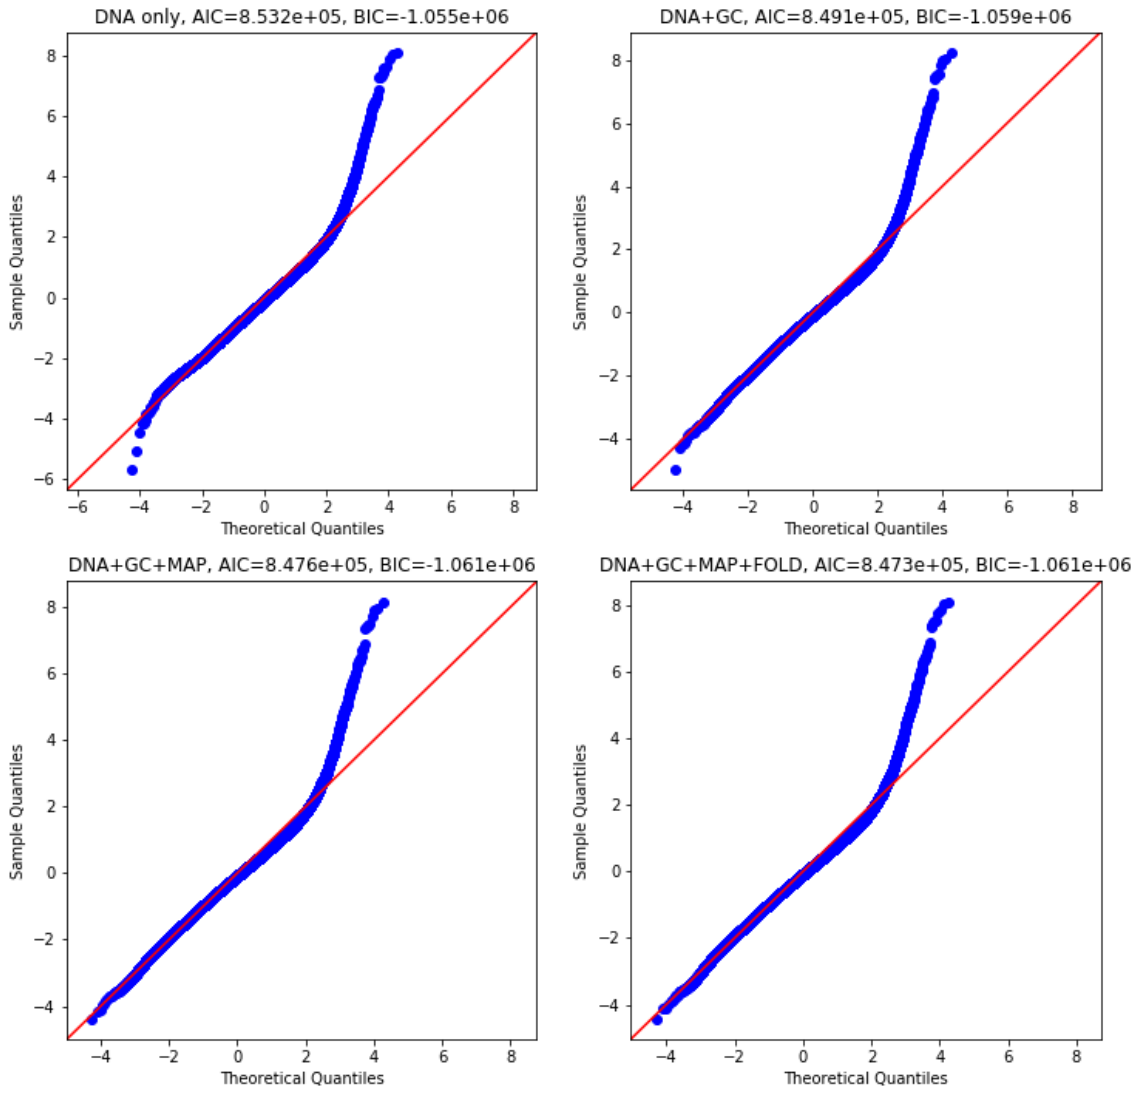

B

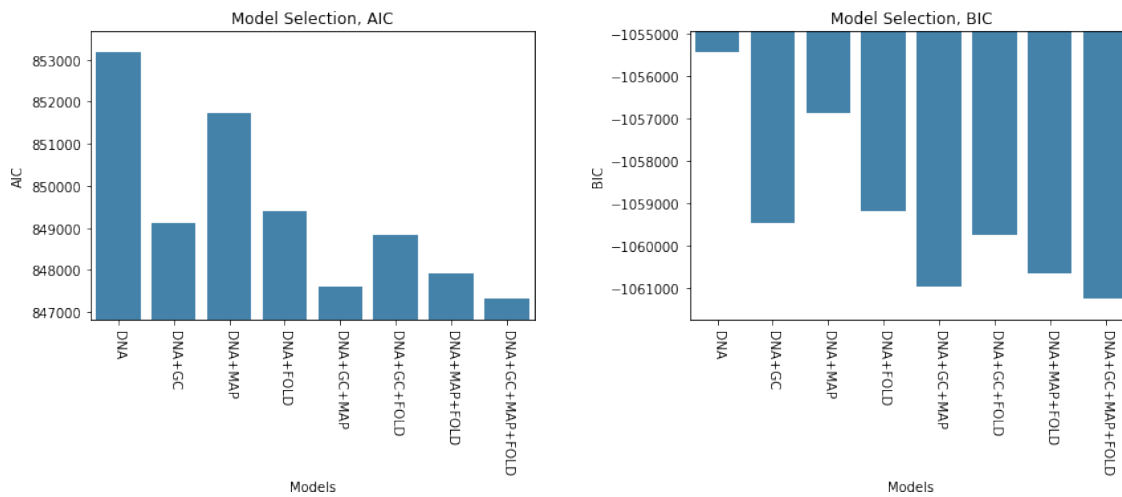

**Figure S4**

**A K562 ORI-WG-STARR-seq**

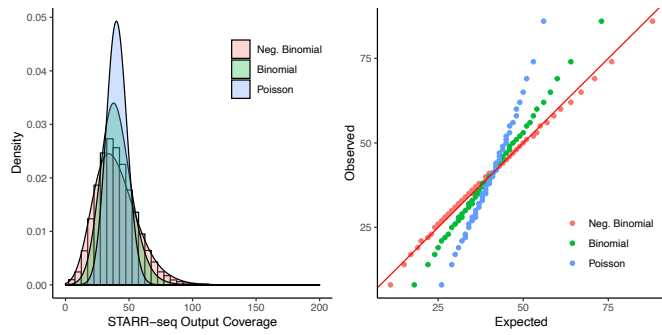

**B HeLa-S3 untreated WG-STARR-seq (Muerdter 2018)**

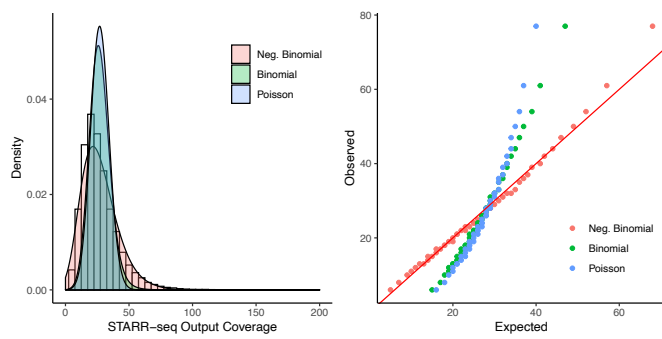

**C GM12878 HiDRA ATAC-STARR-seq (Wang 2018)**

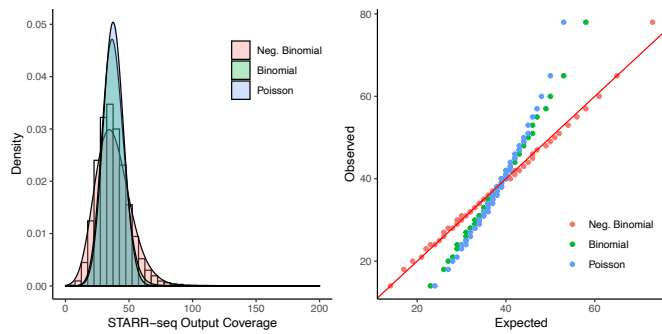

**D K562 Cap-STARR-seq (Rathert 2015)**

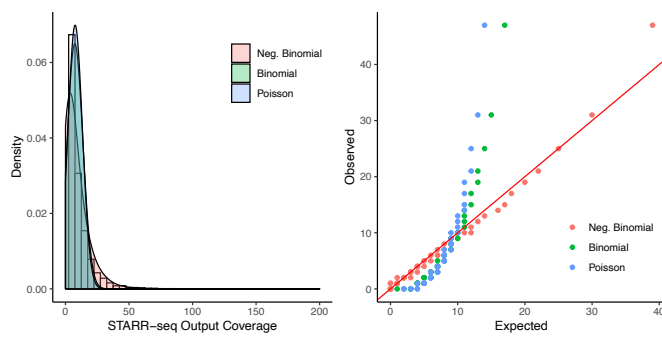



Figure S5

A

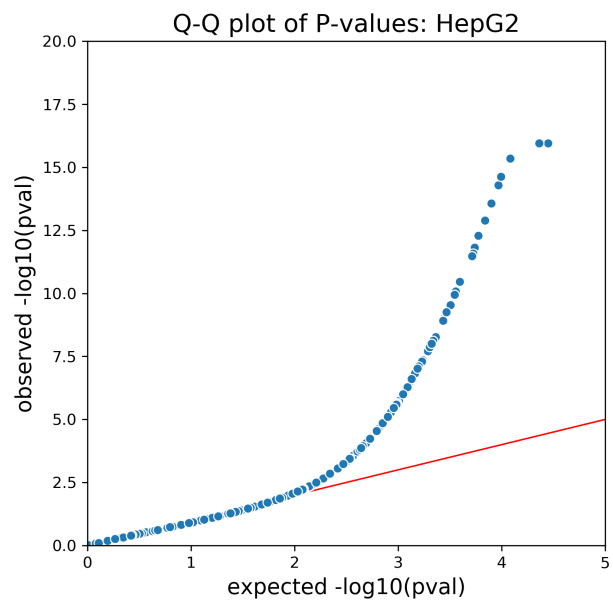

B

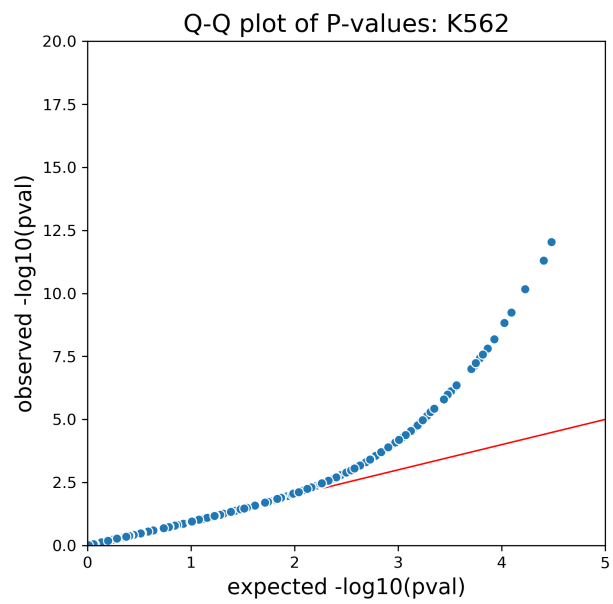

Figure S6

A

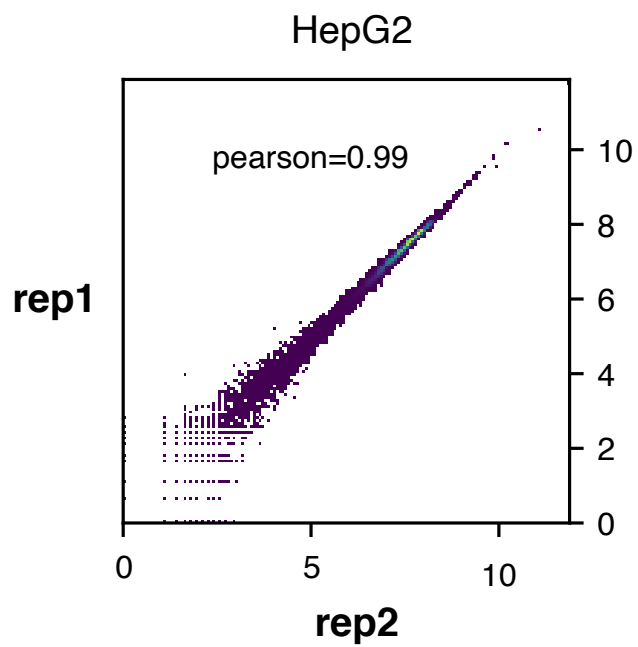

B

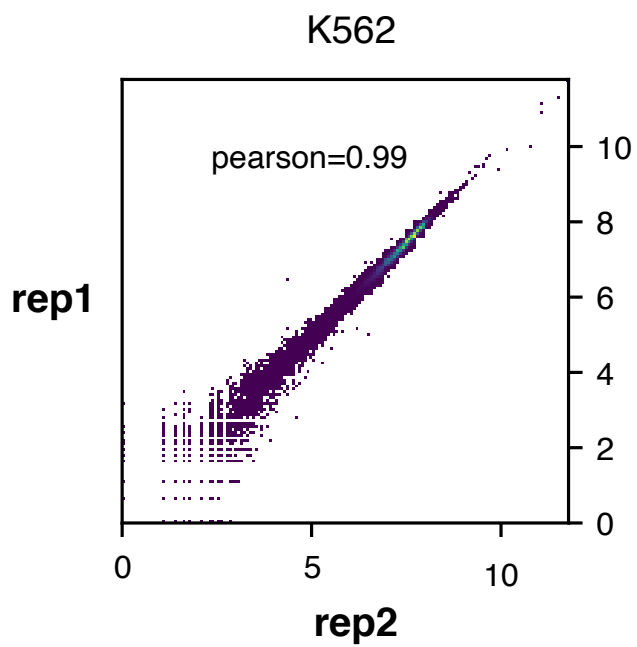

**Figure S7**

**A**

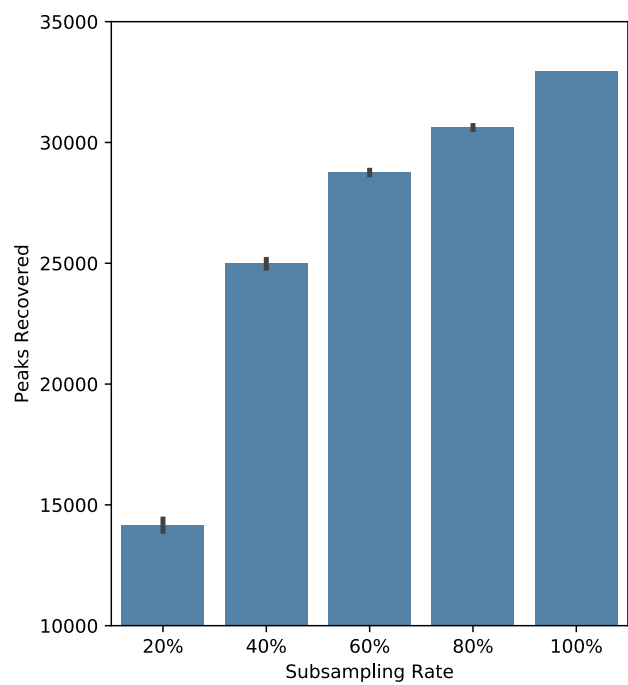

**B**

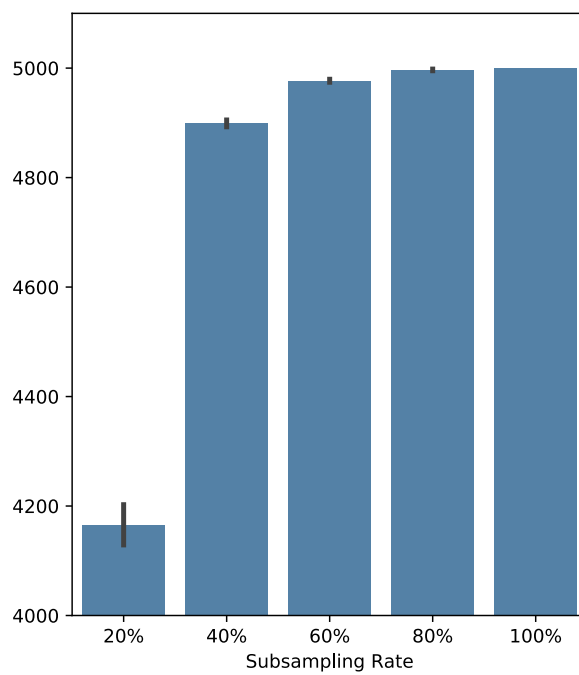

Figure S8

A

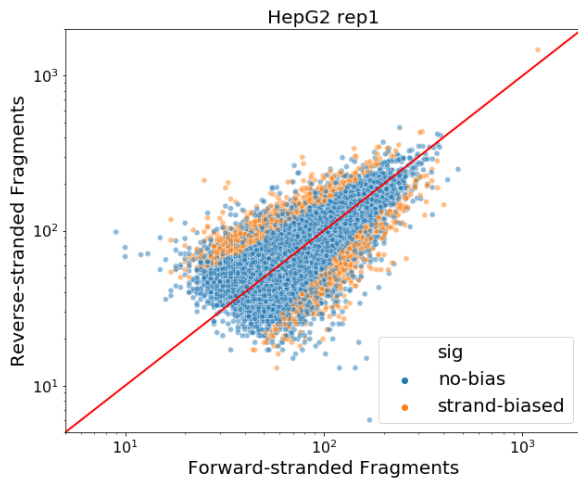

B

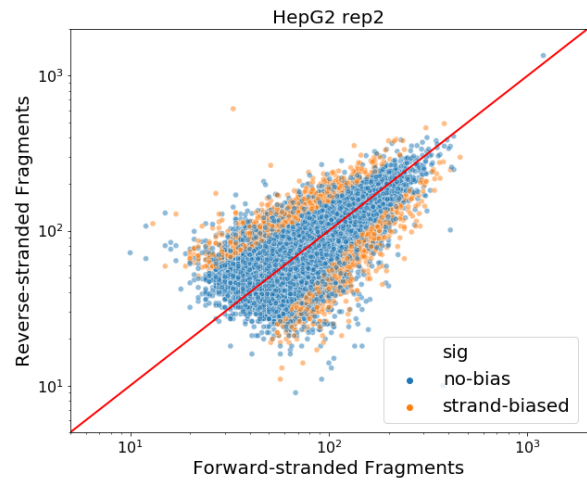

C

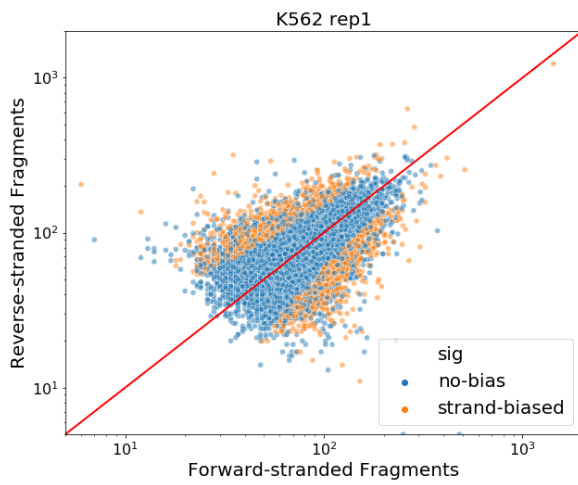

D

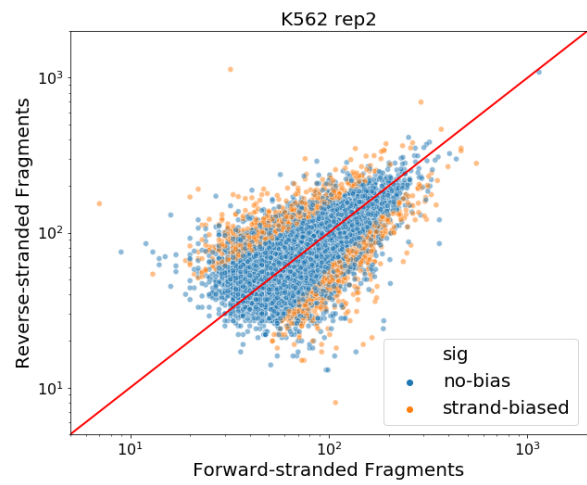

Figure S9

chr8:127,200,000-129,800,000

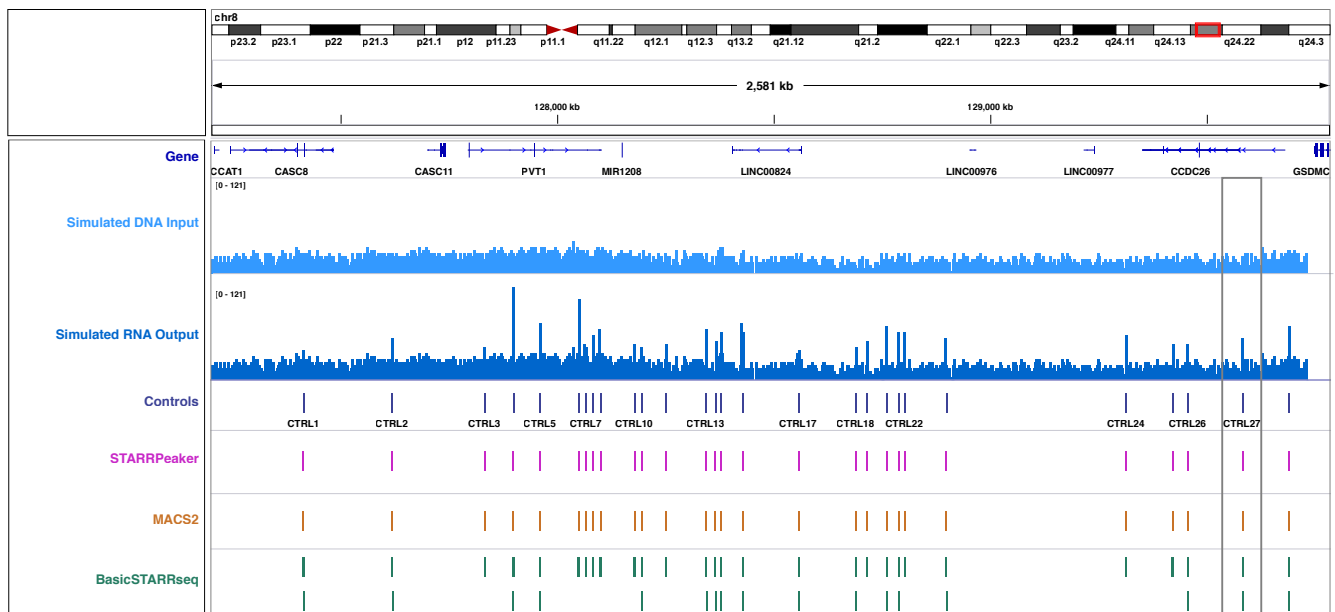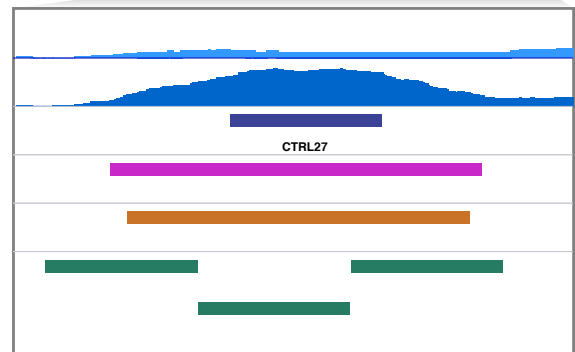

Figure S10

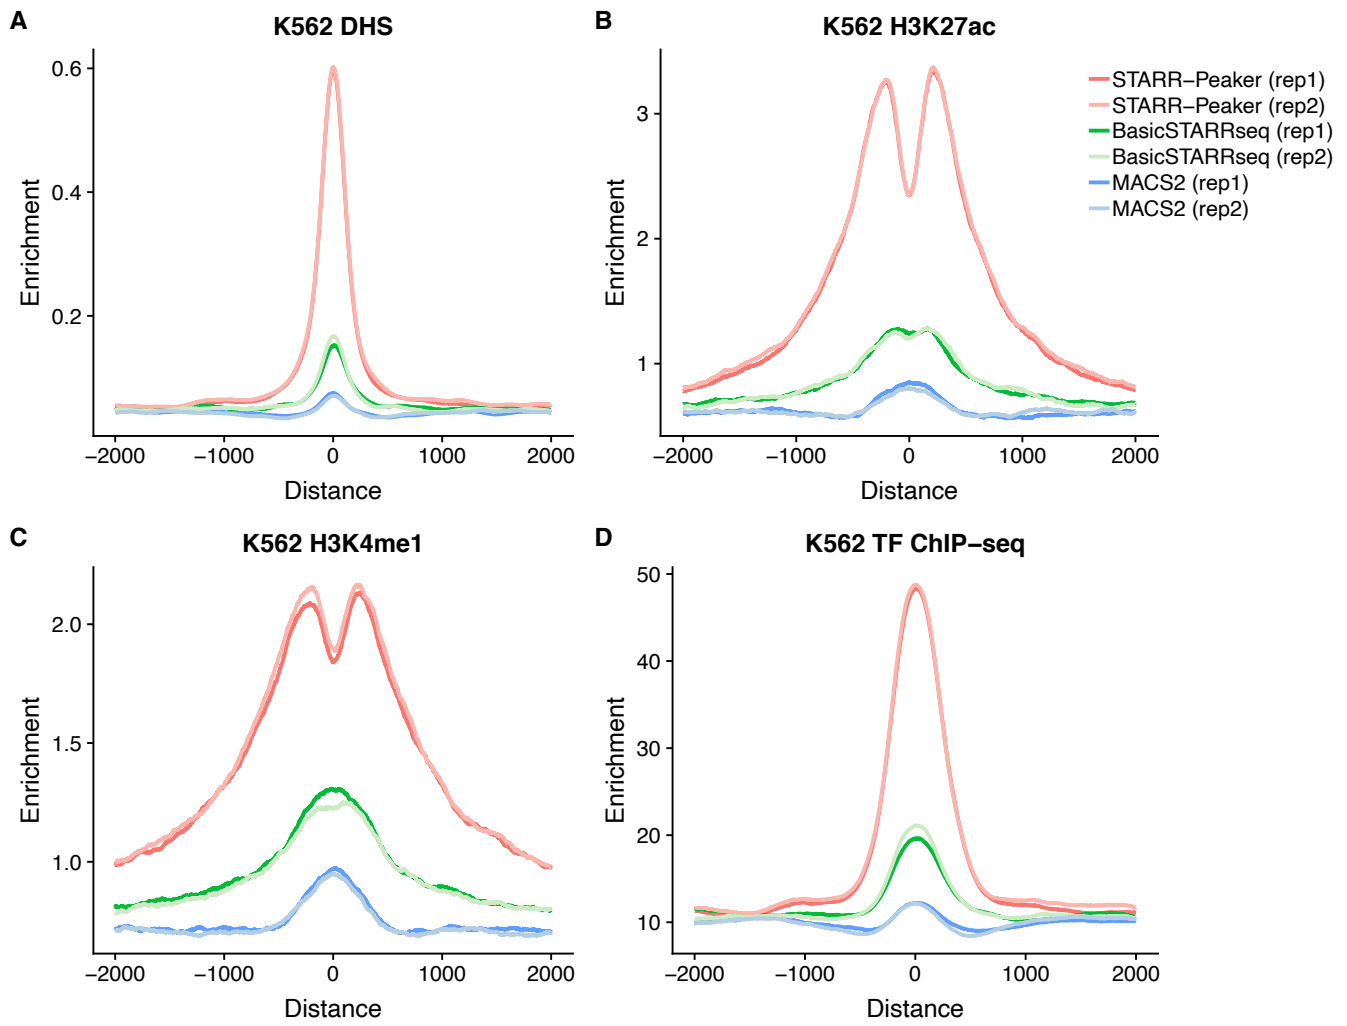

Figure S11

**A** GATA1 locus chrX:48774179-48806695

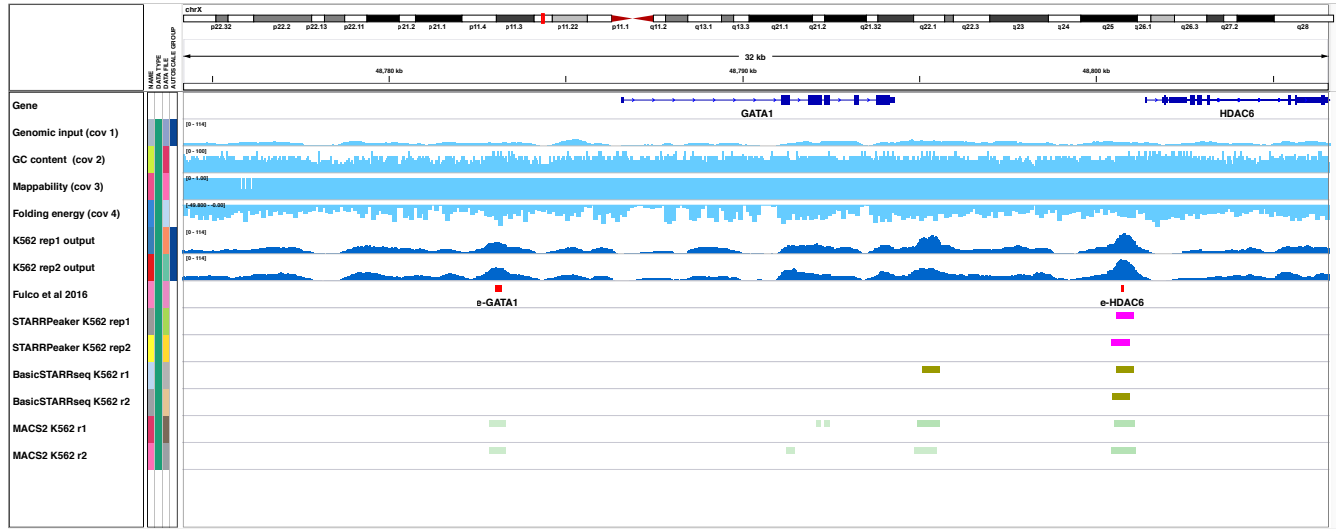

**B** MYC locus chr8:127830000-128090000

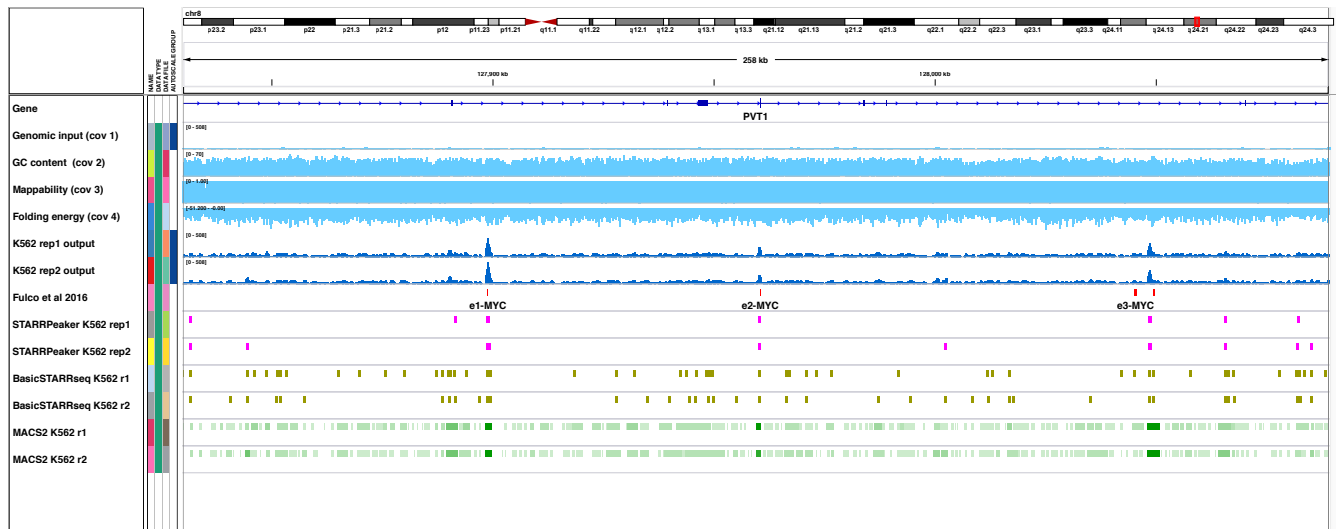

**C** MYC locus chr8:129550000-129720000

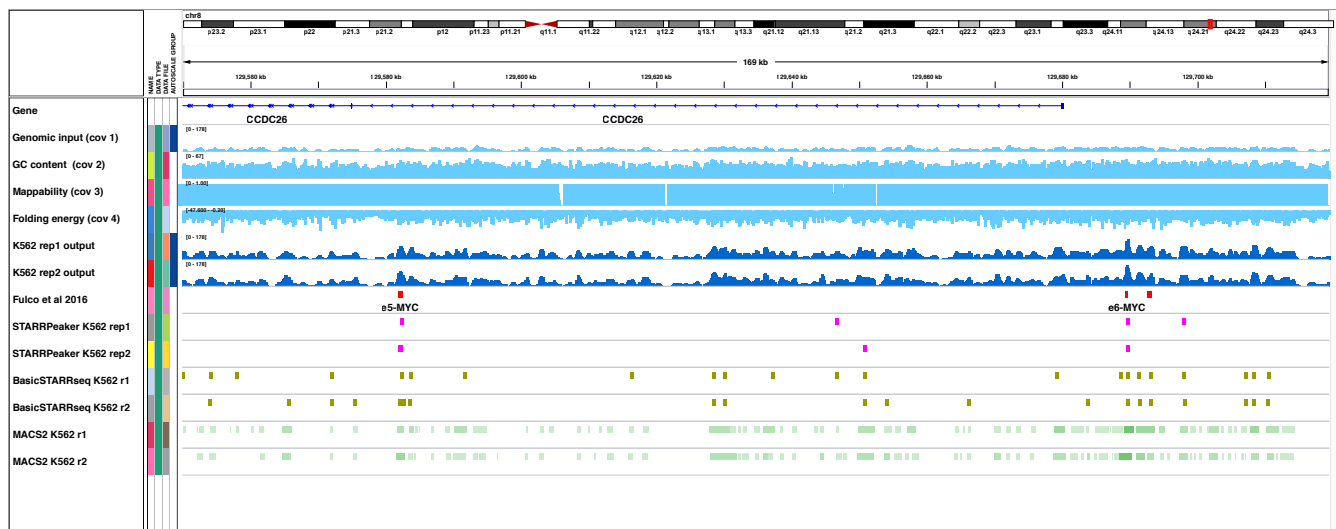

Figure S12

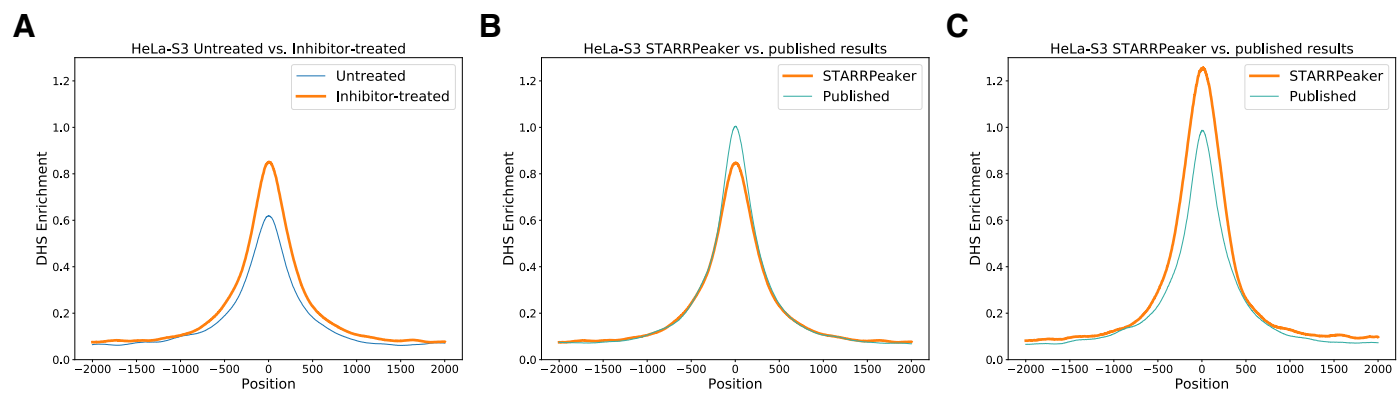



Figure S13

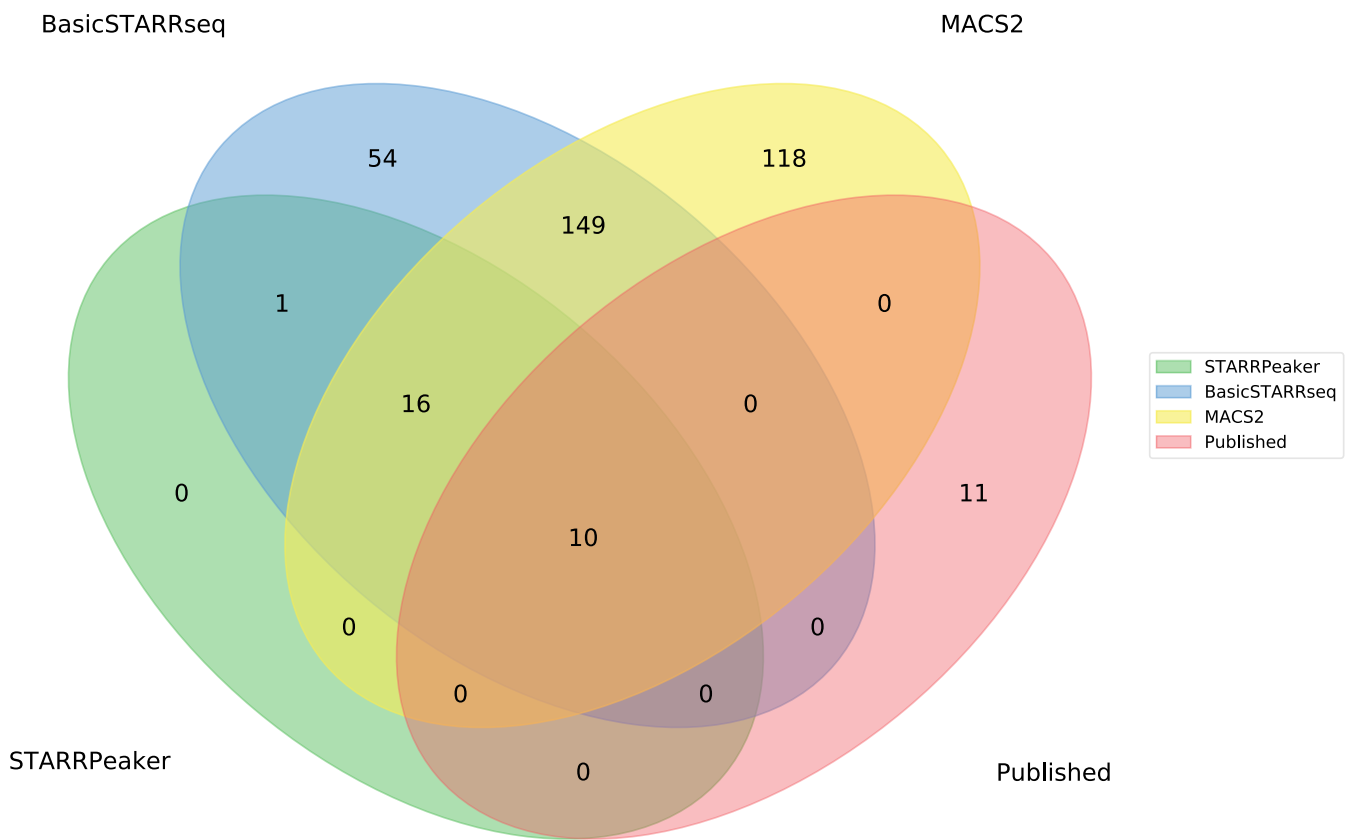

Supplement: 13059_2020_2194_MOESM1_ESM.pdf [file 13059_2020_2194_MOESM1_ESM.pdf]
